# Supplementary material for: Eating Habits and Lifestyle during COVID-19 Lockdown in the United Arab Emirates: A Cross-Sectional Study
Source: PubMed Central journal article supplement (PMC7693610; doi:10.3390/nu12113314), 2020-10-29
Supplement: nutrients-12-03314-s001.pdf [file nutrients-12-03314-s001.pdf]

Eating Habits and Lifestyle during COVID-19 Lockdown in the United Arab Emirates: A  
Cross-Sectional Study

**Personal data**

1. **What is your gender?**
  - Female
  - Male
2. **Which age group do you belong to?**
  - 18-25
  - 26-35
  - 36-45
  - 46-55
  - >56
3. **What is your marital status?**
  - Married
  - Single
  - Divorced
  - Widowed
4. **How many kids do you have?**
  - I have no kids
  - 1-2 kids
  - 3 or more kids
5. **What is your education Level?**
  - Less than high school
  - High School
  - College/ Diploma
  - University Degree
  - Higher education masters/doctorate
6. **What is your employment status?**
  - Full-time employment
  - Part-time employment
  - Unemployed
  - Retired
  - Self-employed
  - Student
7. **Do you currently work/study from home?**
  - Yes
  - No

- Not applicable
8. **Did your weight change during coronavirus pandemic?**
- Lost weight
  - Gained weight
  - Maintained weight
  - I don't know
9. **What option describes your general state of health in the past 3 months?**
- Excellent
  - Very good
  - Good
  - Fair
  - Poor
10. **Emirate of residence? ----**

### **Sources of information**

1. **Where do you get health-related information from? (choose all that apply)**
- Local and international health authorities
  - Websites and social media
  - Healthcare professionals
  - Television
  - Newspapers
  - Friends and family
2. **Where do you get food and nutrition related information from? (choose all that apply)**
- Local and international health authorities
  - Websites and social media
  - Healthcare professionals
  - Television
  - Newspapers
  - Friends and family

## **Eating Habits**

1. **Before coronavirus pandemic, most of your consumed meals during the week were?**
  - Homemade
  - Frozen ready-to-eat meals
  - Fast food (take-away, delivery)
  - Restaurants (take-away, delivery)
  - Healthy food (take-away, delivery)
2. **During coronavirus pandemic most of your consumed meals during the week are?**
  - Homemade
  - Frozen ready-to-eat meals
  - Fast food (take-away, delivery)
  - Restaurants (take-away, delivery)
  - Healthy food (take-away, delivery)
3. **How many meals did you eat per day before coronavirus pandemic?**
  - 1-2
  - 3-4
  - More than 5
4. **How many meals do you eat per day during coronavirus pandemic?**
  - 1-2
  - 3-4
  - More than 5
5. **Did you use to eat breakfast on most days of the week before coronavirus pandemic?**
  - Yes
  - No
6. **During coronavirus pandemic, do you eat breakfast on most days of the week?**
  - Yes
  - No
7. **Before coronavirus pandemic, did you use to skip meals?**
  - Yes
  - No

**If yes, why is that?**

- To reduce food intake
  - Lack of time
  - To lose weight
  - Lack of appetite
  - Fasting
8. **During coronavirus pandemic, are you skipping meals?**

- Yes
- No

**If yes, why is that?**

- To reduce food intake
- Lack of time
- To lose weight
- Lack of appetite
- Fasting

**9. Before coronavirus pandemic, how much water did you use to drink daily?**

- 1-4 cups
- 5-7 cups
- 8 cups or more

**10. During coronavirus pandemic, how much water do you drink daily?**

- 1-4 cups
- 5-7 cups
- 8 cups or more

**11. How often do you eat the following foods listed below?**

| <b>Food Item</b>                               | <b>Never</b> | <b>1-4 times/week</b> | <b>Once/day</b> | <b>2-3 times/day</b> | <b>4 or more times/day</b> |
|------------------------------------------------|--------------|-----------------------|-----------------|----------------------|----------------------------|
| Fruits                                         |              |                       |                 |                      |                            |
| Vegetables                                     |              |                       |                 |                      |                            |
| Milk and milk products                         |              |                       |                 |                      |                            |
| Meat/Chicken/Fish                              |              |                       |                 |                      |                            |
| Bread/rice/pasta                               |              |                       |                 |                      |                            |
| Sweets/ desserts                               |              |                       |                 |                      |                            |
| Coffee/Tea                                     |              |                       |                 |                      |                            |
| Sweet drinks (soft drinks, canned juice, etc.) |              |                       |                 |                      |                            |
| Energy drinks                                  |              |                       |                 |                      |                            |

## **Shopping**

1. **Do you usually prepare a list before grocery shopping?**
  - Yes
  - No
2. **During coronavirus pandemic, did you start stocking up on food?**
  - Yes
  - No
  - I already stock up on food
3. **Would you rather order your groceries online (delivered to your house)?**
  - Yes
  - No
4. **Do you check food labels before purchasing?**
  - Yes
  - No
  - Sometimes
5. **Do you clean and sanitize your groceries before storage?**
  - Yes
  - No
  - Sometimes

## Physical Activity

1. Did you use to exercise before coronavirus pandemic?
  - No
  - 1-3 times/week
  - >3 times/week
2. During coronavirus pandemic, do you do any exercise (walking, running, equipment, etc.)?
  - Never (*skip to Question 3*)
  - 1-3 times/week
  - >3 times/week
3. Before coronavirus pandemic, did you use to do household chores?
  - Never
  - 1-3 times/week
  - 4-5 times/week
  - Everyday
4. During coronavirus pandemic, do you do household chores?
  - Never
  - 1-3 times/week
  - 4-5 times/week
  - Everyday
5. Before coronavirus pandemic, how much time did you spend on the computer for work/study daily?
  - None
  - 1-2 hours
  - 3-5 hours
  - More than 5 hours
6. During coronavirus pandemic, how much time do you spend on the computer for work/study daily?
  - None
  - 1-2 hours
  - 3-5 hours
  - More than 5 hours
7. Before coronavirus pandemic, how much time did you spend daily on Television, computer, social media for entertainment?
  - Less than 30 minutes
  - 1-2 hours
  - 3-5 hours

- More than 5 hours

**8. During coronavirus pandemic, how much time do you spend daily on Television, computer, social media for entertainment?**

- Less than 30 minutes
- 1-2 hours
- 3-5 hours
- More than 5 hours

## Stress and Irritability

### 1. How often have you experienced the following before coronavirus pandemic?

|                       | All the time | A large part of the time | Part of the time | A small part of the time | Not at all |
|-----------------------|--------------|--------------------------|------------------|--------------------------|------------|
| Physically exhausted  |              |                          |                  |                          |            |
| Emotionally exhausted |              |                          |                  |                          |            |
| Irritable             |              |                          |                  |                          |            |
| Tense                 |              |                          |                  |                          |            |

### 2. How often have you experienced the following during coronavirus pandemic?

|                       | All the time | A large part of the time | Part of the time | A small part of the time | Not at all |
|-----------------------|--------------|--------------------------|------------------|--------------------------|------------|
| Physically exhausted  |              |                          |                  |                          |            |
| Emotionally exhausted |              |                          |                  |                          |            |
| Irritable             |              |                          |                  |                          |            |
| Tense                 |              |                          |                  |                          |            |

## Sleep

### 1. Before coronavirus pandemic, how many hours did you sleep per night?

- Less than 7 hours
- 7-9 hours
- More than 9 hours

### 2. During coronavirus pandemic, how many hours are you sleeping per night?

- Less than 7 hours
- 7-9 hours
- More than 9 hours

### 3. How would you rate your sleep quality before coronavirus pandemic?

- Very good
- Good
- Poor

### 4. How would you rate your sleep quality during coronavirus pandemic?

- Very good
- Good
- Poor



**5. Before coronavirus pandemic, did you experience any of the following? (choose all that apply)**

- Slept badly and restlessly
- Hard to go to sleep
- Woken up too early and not been able to get back to sleep
- Woken up several times and found it difficult to get back to sleep
- None of the above

**6. During coronavirus pandemic, do you experience any of the following? (choose all that apply)**

- Slept badly and restlessly
- Hard to go to sleep
- Woken up too early and not been able to get back to sleep
- Woken up several times and found it difficult to get back to sleep
- None of the above

**7. How would you describe your energy level before coronavirus pandemic?**

- Energized
- Neutral
- Lazy

**8. How would you describe your energy level during coronavirus pandemic?**

- Energized
- Neutral
- Lazy
